# Supplementary material
Source: publisher figshare collection journal article supplement (https://karger.figshare.com/articles/dataset/_/5139874)
Supplement: Supplementary file 1 [file 1]

**Supplementary Table 1: Quality Assessment of Cohort Studies Using Newcastle-Ottawa Scale**

| Author, Year      | Study Design               | Cohort Studies |               |         |
|-------------------|----------------------------|----------------|---------------|---------|
|                   |                            | Selection      | Comparability | Outcome |
| Akar 2002         | Retrospective cohort study | ***            | **            | ***     |
| Asai 2015         | Retrospective cohort study | **             | *             | ***     |
| Bando 2005        | Retrospective cohort study | ***            | **            | **      |
| Calafiore 2004    | Retrospective cohort study | ***            | **            | ***     |
| Cingoz 2004       | Prospective cohort study   | ***            | **            | **      |
| Coutinho 2013     | Retrospective cohort study | ***            | **            | **      |
| Davarpasand 2015  | Retrospective cohort study | ***            | **            | ***     |
| David 2013        | Retrospective cohort study | **             | **            | ***     |
| Fukui 2007        | Retrospective cohort study | ***            | **            | **      |
| Hirata 2002       | Retrospective cohort study | ***            | **            | ***     |
| Houser 1990?      | Retrospective cohort study | ***            | **            | ***     |
| Jonjev 2007       | Prospective cohort study   | **             | **            | **      |
| Maleszka 2008     | Retrospective cohort study | **             | *             | ***     |
| Malhotra 2014     | Retrospective cohort study | ***            | **            | ***     |
| Murakami 2009     | Retrospective cohort study | ***            | **            | ***     |
| Murashita 2014    | Retrospective cohort study | ***            | **            | ***     |
| Nicolini 2006     | Retrospective cohort study | **             | **            | ***     |
| Papadopoulos 2015 | Retrospective cohort study | ***            | **            | **      |
| Rathore 2008      | Retrospective cohort study | ***            | **            | ***     |
| Santini 2001      | Retrospective cohort study | ***            | *             | ***     |
| Seeburger 2010    | Retrospective cohort study | ***            | **            | **      |
| Shinn 2009        | Retrospective cohort study | ***            | **            | ***     |
| Sjatskig 2012     | Retrospective cohort study | **             | **            | ***     |
| Stefanidis 2005   | Retrospective cohort study | ***            | **            | ***     |
| Stevens 2010      | Prospective cohort study   | ***            | **            | ***     |
